# Supplementary material for: Thuricin17 Production and Proteome Differences in Bacillus thuringiensis NEB17 Cell-Free Supernatant Under NaCl Stress
Source: Frontiers journal article supplement (doi:10.3389/fsufs.2021.630628), 2021-03-11
Supplement: Data_Sheet_2.xlsx [file Data_Sheet_2.xlsx]

## Sheet: Bth Ctrl Vs 200mM NaCl
#	Identified Proteins (287)	Accession Number	Molecular Weight	Fishers Exact test (p-value)	Bth Control	Bth 200 mM NaCl
13	cold-shock DNA-binding protein family [Bacillus thuringiensis str. Al Hakam]	gi|118418013 (+20)	7 kDa	0.000337	47.3333	70
29	cold-shock DNA-binding protein family [Bacillus thuringiensis str. Al Hakam]	gi|118419204 (+16)	7 kDa	0.016067	34.3333	36
5	Hbl L2 protein [Bacillus thuringiensis]	gi|84578885	49 kDa	0.0243967	58.3333	71
4	S-layer protein / Peptidoglycan endo-beta-N-acetylglucosaminidase [Bacillus thuringiensis serovar berliner ATCC 10792]	gi|228939159 (+4)	44 kDa	0.0276	61.6667	60.6667
181	Collagenase [Bacillus thuringiensis serovar huazhongensis BGSC 4BD1]	gi|228924428	108 kDa	0.030237	84.3333	105
53	pyruvate dehydrogenase complex E2 component, dihydrolipoamide acetyltransferase [Bacillus thuringiensis str. Al Hakam]	gi|118418407 (+21)	46 kDa	0.0377333	5	16

## Sheet: Bth Ctrl Vs 500mM NaCl
#	Identified Proteins (287)	Accession Number	Molecular Weight	Fisher's Exact test (p-value)	Bth Control	Bth 500 mM NaCl
3	Hemolytic enterotoxin [Bacillus thuringiensis serovar andalousiensis BGSC 4AW1]	gi|228933216 (+2)	43 kDa	< 0.00010	152.333	66.3333
13	cold-shock DNA-binding protein family [Bacillus thuringiensis str. Al Hakam]	gi|118418013 (+20)	7 kDa	0.00016	47.3333	11.3333
41	3D domain protein [Bacillus thuringiensis serovar kurstaki str. T03a001]	gi|228951290	48 kDa	0.00293	6.66667	36
17	elongation factor G [Bacillus thuringiensis BMB171]	gi|296500941	76 kDa	0.00433	20	49.3333
67	2-oxoisovalerate dehydrogenase subunit beta [Bacillus thuringiensis IBL 4222]	gi|228902675 (+11)	36 kDa	0.00565667	4.66667	19.3333
48	Processed glycerol phosphate lipoteichoic acid synthase 2 [Bacillus thuringiensis IBL 200]	gi|228908700 (+4)	75 kDa	0.00699	24.6667	7.33333
10	Sphingomyelinase C [Bacillus thuringiensis serovar huazhongensis BGSC 4BD1]	gi|228919526	37 kDa	0.00944	71.6667	36
33	Phosphopentomutase [Bacillus thuringiensis serovar huazhongensis BGSC 4BD1]	gi|228922839 (+5)	42 kDa	0.00996	10.3333	31
19	Dihydrolipoyl dehydrogenase [Bacillus thuringiensis IBL 4222]	gi|228902475 (+13)	49 kDa	0.0100933	23.6667	47
4	S-layer protein / Peptidoglycan endo-beta-N-acetylglucosaminidase [Bacillus thuringiensis serovar berliner ATCC 10792]	gi|228939159 (+4)	44 kDa	0.0111033	61.6667	89
61	ornithine carbamoyltransferase [Bacillus thuringiensis str. Al Hakam]	gi|118415344 (+7)	38 kDa	0.0114133	3.66667	16
30	Alveolysin [Bacillus thuringiensis IBL 200]	gi|228910930 (+4)	57 kDa	0.0114567	35	14.6667
181	Collagenase [Bacillus thuringiensis serovar huazhongensis BGSC 4BD1]	gi|228924428	108 kDa	0.0185	84.3333	94.6667
2	Collagenase [Bacillus thuringiensis serovar kurstaki str. T03a001]	gi|228951044	108 kDa	0.02437	155.667	163.667
210	Extracellular solute-binding protein family 5 [Bacillus thuringiensis IBL 4222]	gi|228902084 (+4)	64 kDa	0.027	6	0.333333
134	Sulfatase [Bacillus thuringiensis IBL 4222]	gi|228903704 (+9)	73 kDa	0.02792	10	1
179	conserved hypothetical protein [Bacillus thuringiensis str. Al Hakam]	gi|118415358 (+20)	12 kDa	0.0337333	0	5.66667
115	3D domain protein [Bacillus thuringiensis serovar huazhongensis BGSC 4BD1]	gi|228921618	56 kDa	0.0339667	2.66667	11.3333
114	universal stress protein family [Bacillus thuringiensis str. Al Hakam]	gi|118418994 (+18)	19 kDa	0.0416667	10.6667	3.33333

## Sheet: Bth 200 Vs 500mM NaCl
#	Identified Proteins (287)	Accession Number	Molecular Weight	Fishers Exact test (p-value)	Bth 200 mM NaCl	Bth 500 mM NaCl
13	cold-shock DNA-binding protein family [Bacillus thuringiensis str. Al Hakam]	gi|118418013 (+20)	7 kDa	< 0.00010	70	11.3333
3	Hemolytic enterotoxin [Bacillus thuringiensis serovar andalousiensis BGSC 4AW1]	gi|228933216 (+2)	43 kDa	0.0002	122.667	66.3333
29	cold-shock DNA-binding protein family [Bacillus thuringiensis str. Al Hakam]	gi|118419204 (+16)	7 kDa	0.000217	36	3
59	50S ribosomal protein L15 [Bacillus thuringiensis serovar huazhongensis BGSC 4BD1]	gi|228919079 (+3)	15 kDa	0.00406667	15.3333	3
6	Phospholipase C [Bacillus thuringiensis IBL 4222]	gi|228899359 (+10)	32 kDa	0.0170333	69	41
10	Sphingomyelinase C [Bacillus thuringiensis serovar huazhongensis BGSC 4BD1]	gi|228919526	37 kDa	0.0204	63.3333	36
41	3D domain protein [Bacillus thuringiensis serovar kurstaki str. T03a001]	gi|228951290	48 kDa	0.027733	15.6667	36
30	Alveolysin [Bacillus thuringiensis IBL 200]	gi|228910930 (+4)	57 kDa	0.045	27.6667	14.6667
165	LSU ribosomal protein L16P [Bacillus thuringiensis str. Al Hakam]	gi|118415111 (+21)	18 kDa	0.048	5.33333	0.333333
